# Supplementary material for: Characterization of a L-Gulono-1,4-Lactone Oxidase Like Protein in the Floral Nectar of Mucuna sempervirens, Fabaceae
Source: Front Plant Sci. 2018 Jul 30;9:1109. doi: 10.3389/fpls.2018.01109 (PMC6077269; doi:10.3389/fpls.2018.01109)
Supplement: TABLE S2 — Mucuna sempervirens nectar proteins identified by 2-DE and mass spectrometry. [file Table_2.XLSX]

## Sheet: Sheet1
Table S2	Mucuna sempervirens nectar proteins identified by 2-DE and mass spectrometry
Spot number	Accession	Protein name	Species	Score
1	KHG01649	L-gulonolactone oxidase	Gossypium arboreum	118
2	KHG01649	L-gulonolactone oxidase	Gossypium arboreum	85
3	KHG01649	L-gulonolactone oxidase	Gossypium arboreum	80
4	AFD10411	Desiccation-related protein	Mucuna sempervirens	293
5	XP_004486531	Desiccation-related protein PCC13-62-like	Cicer arietinum	61
6	XP_015868231	Uncharacterized protein	Ziziphus jujuba	58
7	XP_003545771	Pathogenesis-related protein 1-like	Glycine max	56
8	AFG50738	Pathogenesis-related protein 1-like	Pinus taeda	56
